# Supplementary material for: Differential Disrupting Effects of Prolonged Low-Dose Exposure to Dichlorodiphenyltrichloroethane on Androgen and Estrogen Production in Males
Source: PubMed Central journal article supplement (PMC8003643; doi:10.3390/ijms22063155), 2021-03-19
Supplement: ijms-22-03155-s001.pdf [file ijms-22-03155-s001.pdf]

## Supplement

**Table S1.** Physical and chemical characteristics of o,p-DDT.

| Property            | Information                                                                                                                                |
|---------------------|--------------------------------------------------------------------------------------------------------------------------------------------|
| Synonyms            | 2,4'-DDT<br>1,1,1-trichloro-2-( <i>o</i> -chlorophenyl)-2-( <i>p</i> -chlorophenyl)ethane<br><i>o,p'</i> -dichlorodiphenyl-trichloroethane |
| Chemical formula    | C <sub>14</sub> H <sub>9</sub> Cl <sub>5</sub>                                                                                             |
| Chemical structure  | 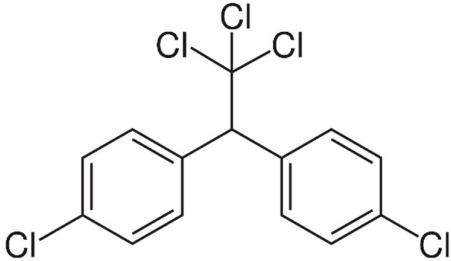                                                         |
| CAS registry number | 789-02-6                                                                                                                                   |
| Molecular weight    | 354.49                                                                                                                                     |
| Physical state      | Solid, crystalline powder                                                                                                                  |
| Color               | white                                                                                                                                      |
| Odor                | odorless                                                                                                                                   |
| Density             | 0.985 g/cm <sup>3</sup> at 20°C                                                                                                            |
| Water solubility    | 85 µg/l at 25°C                                                                                                                            |
